# Supplementary material for: DsDBF1, a Type A-5 DREB Gene, Identified and Characterized in the Moss Dicranum scoparium
Source: MDPI journal article supplement (doi:10.3390/life13010090), 2022-12-28
Supplement: s1 [file s1]

### ***DsDBF1* Coding domain sequence (CDS)**

atg gta gaa aag acg gct ccg tcg tca att agt gcc aag cgg ggc gga  
aag ctc ttg gcg cct ctg aaa acg cac tcc ggg gcc ata gcc aag aaa  
tcc tct gca ccg gag aaa ctg tcc att tcg caa tcg ccc gcg tgt ccg  
aag ctg tac aag ggc gtg cgc atg cgc acg tgg ggg aaa tgg gtg tct  
gag att cga gag ccc aac aag agg tcg cgc att tgg ctg ggc tcc ttc  
ccc acg gcc gaa atg gca gcc aaa gcc tac gac gcg gcc gtg gtg tgc  
ctc cga ggc cag tcc gcg acg ctc aat ttc ccc gac tca ccc ccg cag  
tgc atc tcc ccc tcc cga gct ccc aag gac gtg caa gca gcc gcg gcc  
gcc gct gcg gct gcg tgc gcc tcc gcc tcc cct ctc gca gag ccc acc  
aac acc ccc aca ttc gag agc acc acc gtc gaa tcg ttg cac tcg ccc  
ctg cat tgc gaa gca tcg tcc gcg ctc gcc atg gcc gag ccg cag tct  
agc ttc gag gtg gag gag tgg atc caa gcg gag ttc gga gac ttg gag  
ccc ctg atc gac aac gcc ttc cgc ttc cct gag ctc ccg ccg tgc gta  
ttc gac tcc cag ttt caa atc ttc caa ccc agc gcc gga ccc ctc gag  
gcg gac aac aga gcg ctc tac gac agc ctt tgg tgc ttt tcg taa

### **DsDBF1 protein sequence**

MVEKTAPSSISAKRGGKLLAPLKTHSGAIAKKSSAPEKLSISQSPACPKLYKGVRMRTWGWVS  
EIREPNKRSRIWLGSFPTAEMAAKAYDAAVVCLRGQSATLNFPDSPQCISPSRAPKDVQAAAA  
AAAAACASASPLAEPTNTPTFESTTVESLHSPLHCEASSALAMAEPQSSFEVEEWIQAEEFGDLE  
PLIDNAFRFPELPPCVFDSQFQIFQPSAGPLEADNRALYDSLWCFS
