# Supplementary material for: DsDBF1, a Type A-5 DREB Gene, Identified and Characterized in the Moss Dicranum scoparium
Source: MDPI journal article supplement (doi:10.3390/life13010090), 2022-12-28
Supplement: s1 [file s1]

Table S1. Primers of RT-qPCR.

| Gene name                       | Sequence 5'–3'                                            | Product size, bp | Tm, °C |
|---------------------------------|-----------------------------------------------------------|------------------|--------|
| <i>DsDBF1</i>                   | F: TGGGTGTCTGAGATTCGAGAG<br>R: GTAGGCTTTGGCTGCCATT        | 87               | 60     |
| <i>18S</i>                      | F: TGGAGGGCAAGTCTGGTG<br>R: TTAACTGCAACAACCTTAAATATACGC   | 75               | 60     |
| <i>GAPDH2</i>                   | F: TCAGTGGTGGACTTGACTGTG<br>R: CTGCCTTGACGTCCTCGTA        | 61               | 59     |
| <i><math>\alpha</math>-TUB1</i> | F: TCTATGATGGCGAAGTGCGACCCC<br>R: GGGGGCTGGTAGTTGATTCCGCA | 182              | 64     |
| <i><math>\alpha</math>-TUB2</i> | F: TTGTGGACTTGTGCTTGGACCG<br>R: AGCCTCTCCAGCAACAGCGAAC    | 130              | 59     |
