# Supplementary material for: DsDBF1, a Type A-5 DREB Gene, Identified and Characterized in the Moss Dicranum scoparium
Source: MDPI journal article supplement (doi:10.3390/life13010090), 2022-12-28
Supplement: s1 [file s1]

|                |                                                              |     |
|----------------|--------------------------------------------------------------|-----|
| GmDREBP        | -----                                                        | 0   |
| OsDREBP2A      | -----ME-----                                                 | 2   |
| TaDREBP1       | -----MET-----                                                | 3   |
| DREBP1A        | -----                                                        | 0   |
| CRT/DREBP      | -----                                                        | 0   |
| OsDREB1F       | -----MDT-----                                                | 3   |
| CbCBF          | -----MNSSFSAFSEMF-----                                       | 12  |
| BnCBF          | -----MNSVSTFSELL-----                                        | 11  |
| CaCBF1B        | -----MNIFRSYSDPLTE-----                                      | 14  |
| PaDREB1F       | -----MDMFFSQLSDSVDQ-----                                     | 14  |
| GhDBP          | MAAAMDF---ISIGVDQSDLYGGELMEALEPFMKVSSSSSPSPSPSPSSLPSTSYLSF   | 57  |
| GmDREBP_NP     | MGTAIMYNSNIVADFLDPYSEELMKALKPFMKSDYFSASSSSSL-----            | 46  |
| ZmDBF1         | -----                                                        | 0   |
| TINY2          | -----MAEYYSL-----                                            | 8   |
| ERF034         | -----MVEPLS-----PT-----                                      | 8   |
| ZmDBF2         | -----MAQELHETSSCSAT-----                                     | 14  |
| ERF038         | -----MAMAKELQETSSSSS-----                                    | 15  |
| GhDREBP1       | -----                                                        | 0   |
| ERF_QDB64575.1 | -----MVD-----TPRSS-----                                      | 8   |
| ERF_QCF46602.1 | -----MVDKQRLHTSS-----                                        | 11  |
| ERF            | -----MVEK-----IAVSS-----                                     | 9   |
| PpDBF1         | -----MVEK-----WVSS-----                                      | 9   |
| DsDBF1         | -----MVEK-----TAPSS-----                                     | 9   |
| DREBP5         | -----MVEK-----AVSST-----                                     | 9   |
| ERF039-like    | -----MGESIGWVAEQPTT-----                                     | 15  |
| OsRAP          | -----                                                        | 0   |
| ERF_TINY-like  | -----MVQK-----                                               | 4   |
| GmDREBP3       | -----                                                        | 0   |
| ERF016         | -----                                                        | 0   |
| ERF016_XP      | -----                                                        | 0   |
|                |                                                              |     |
| GmDREBP        | -----MHMLVK-NHNKGDGSKSLADTLAKW-----                          | 24  |
| OsDREBP2A      | -----RGEGRGD-----CSVQVRKKR-TRRKSDGPDSIAETIKWW-----           | 37  |
| TaDREBP1       | -----GGSKREGD-----CPGQERKKK-VRRRSTGPDVAETIKKW-----           | 38  |
| DREBP1A        | -----                                                        | 0   |
| CRT/DREBP      | -----                                                        | 0   |
| OsDREB1F       | -----                                                        | 3   |
| CbCBF          | -----                                                        | 12  |
| BnCBF          | -----                                                        | 11  |
| CaCBF1B        | -----                                                        | 14  |
| PaDREB1F       | -----                                                        | 14  |
| GhDBP          | SSSETQPNFYPDSCCYPYPTPMDSVSCPQQQTGSTIGLNSLTQAQIHQIQQLQFHLHNNQ | 117 |
| GmDREBP_NP     | ---ESQ-----PCSF-----SSNSLPTSYPSSNQIKLNQLTPDQIVQIQAIHQIQQQQ   | 91  |
| ZmDBF1         | -----MQFIQAQLHLQRNP-----                                     | 14  |
| TINY2          | -----RS-----                                                 | 10  |
| ERF034         | -----SSSACSSSCLPTS-----                                      | 21  |
| ZmDBF2         | -----TTSSCTTSCCSSTVT-DSSSSPPSPAAANAAPA-----                  | 46  |
| ERF038         | -----SSAASTSSCSSAVT-DAWSSPARPNAVAGGK-----                    | 45  |
| GhDREBP1       | -----M-----                                                  | 1   |
| ERF_QDB64575.1 | -----PVS-----                                                | 11  |
| ERF_QCF46602.1 | -----PSR-----                                                | 14  |
| ERF            | -----LHA-----                                                | 12  |
| PpDBF1         | -----LRR-----                                                | 12  |
| DsDBF1         | -----ISA-----                                                | 12  |
| DREBP5         | -----LRG-----                                                | 12  |
| ERF039-like    | -----IWD-----                                                | 18  |
| OsRAP          | -----                                                        | 0   |
| ERF_TINY-like  | -----DWS-----                                                | 7   |
| GmDREBP3       | -----                                                        | 0   |
| ERF016         | -----                                                        | 0   |
| ERF016_XP      | -----                                                        | 0   |

|                |                                                                |     |
|----------------|----------------------------------------------------------------|-----|
| GmDREBP        | -----KEYNAWLSENN-----AEKPVKVPKAGSKKGCMAKGG                     | 58  |
| OsDREBP2A      | -----KEQNQLQEE-----NSSRKAPAKGSKKGCMAKGG                        | 67  |
| TaDREBP1       | -----KEENQLQEE-----NGSRKAPAKGSKKGCMAKGG                        | 68  |
| DREBP1A        | ---MCGIKQEM-----SGESSGSPCS-SAS-AERQH-QTWTAPPKRPAGRTK           | 42  |
| CRT/DREBP      | -----M-----DT-----AA-AGS-PREGH-RTVCSEPPKRPAGRTK                | 29  |
| OsDREB1F       | -----EDTSSASSSSVSPSSSPGGGH---HRLPPKR---RAGRKK                  | 38  |
| CbCBF          | -----GSEYESPVSSGGDYCPTLATSCPCK---PAGRKK                        | 44  |
| BnCBF          | -----RSENEPVNTEGGDYI---LAASCCK---PAGRKK                        | 41  |
| CaCBF1B        | -----SSSSFSDDSIYSPNRAIFSDEEVILASNNPKK---PAGRKK                 | 52  |
| PaDREB1F       | -----PQSSLLSDASVTTRGASCSDGDVILASSRPKK---RAGRRV                 | 52  |
| GhDBP          | PSYLCQSPQPNTISANSNPMVSFLCPK-----PVPMKHVG                       | 15  |
| GmDREBP_NP     | QHV-----AQQTQHLGPK-----RVPMKHAG                                | 112 |
| ZmDBF1         | G-----LGPR-----AQPMP-KPAVPVPPAP                                | 33  |
| TINY2          | -----ERVTLQLLVPNSESD-----SVS-DKSKAEQSEKTKRG                    | 42  |
| ERF034         | -----KSEKETNAVCG---SRAVKKQII                                   | 42  |
| ZmDBF2         | -----TKRQALAEAEAEA---GGEEEEEEEGCAGNKAAPAKKRP                   | 86  |
| ERF038         | -----RKKEVVGAEDEAAGGGAEEEEEEAEAAAGKSSAATKKRKR                  | 87  |
| GhDREBP1       | -----ELGDCCLTS-----SPASGEKRLH                                  | 21  |
| ERF_QDB64575.1 | -----RRGSGFLKP-----KKKRKSKKCKGVMSE---GGGD                      | 40  |
| ERF_QCF46602.1 | -----RRGSKFLKS-----SRKKKKQKEEAGSSAE---KE-S                     | 42  |
| ERF            | -----KRGGNLLAS-----LKLNA-YSIAKSSSKLVKPV                        | 42  |
| PpDBF1         | -----KRGGNLLAP-----LKRNV-SSIAKSSSTPK---SG                      | 39  |
| DsDBF1         | -----KRGGKLLAP-----LK-THSGAIKSSSAPEKLSIS                       | 42  |
| DREBP5         | -----KRGGSLAP-----TLARSQVIGKLLSSH---V                          | 38  |
| ERF039-like    | -----RRRSKR-----RVVE---SSDEYPTTSP                              | 38  |
| OsRAP          | -----MS-----SSSPVVA                                            | 9   |
| ERF_TINY-like  | -----SRGTLDIGT-----DTLHCQGLG---RDKQQHAMMK                      | 35  |
| GmDREBP3       | -----MAKPSSE-----KP--                                          | 9   |
| ERF016         | -----MVRPSGG-----RE--                                          | 9   |
| ERF016_XP      | -----MVRPGRG-----RDNG                                          | 11  |
| GmDREBP        | GPENLRNCNRYGVRQRTW-GKWAIEIREPNR-GSRLWLGTFTPTAISALAYDEAAMAMYG-  | 115 |
| OsDREBP2A      | GPENSNCAYRGVRQRTW-GKWAIEIREPNR-GRRLLWLSFPTALEAAHAYDEAARAMYG-   | 124 |
| TaDREBP1       | GPENSNCAYRGVRQRTW-GKWAIEIREPNR-GNRLWLGSFPTAVEAARAYDDAARAMYG-   | 125 |
| DREBP1A        | FRERHPVFRGVRRRRGNAGRWVCEVRVPGRRCRLWLGTFTDAEGAARAHDAAMLAINAG    | 102 |
| CRT/DREBP      | FRERHPLYRGVRRRGRLGWVCEVRVRGAQGYRLWLGTFTTAEMAARAHDSAVLALLD-     | 88  |
| OsDREB1F       | FRERHPVYRGVRRARAGGSRWVCEVREPQA-QARIWLGTYPTEMAARAHDAVAIALRG     | 97  |
| CbCBF          | FRERHPVYRGVRRRNS-GKWVCEVREPKN-KSRIWLGTFPTAEMAARAHDAVAIALRG-    | 101 |
| BnCBF          | FQERHPIYRGVRLRKS-GKWVCEVREPKN-KSRIWLGTFKTAIAARAHDAVAIALRG-     | 98  |
| CaCBF1B        | FRERHPVYRGVRRNS-GKWVCEVREPKN-KSRIWLGTFPTAEMAARAHDAVAIALRG-     | 109 |
| PaDREB1F       | FKERHPIYRGVRRRNN-DKWVCEVREPKN-KSRIWLGTYPTAEMAARAHDAVAIALRG-    | 110 |
| GhDBP          | APSKPTKLYRGVRQRHW-GKWAIEIRLPKN-RTRLWLGTFTDAEAAALAYDKAAYKLRG-   | 209 |
| GmDREBP_NP     | TAAPSKPTKLYRGVRQRHW-GKWAIEIRLPKN-RTRLWLGTFTDAEAAALAYDNAAFKLRG- | 169 |
| ZmDBF1         | APQRPVKLYRGVRQRHW-GKWAIEIRLPKN-RTRLWLGTFTDAEQAALAYDQAAVYLRG-   | 90  |
| TINY2          | RDSGKHPVYRGVRRNRW-GKWSEIREPRK-KSRIWLGTFPTAEMAARAHDAVAIALRG-    | 99  |
| ERF034         | RDGRKHPTYRGVRRNRW-GKWSEIREPRK-KSRIWLGTFPTAEMAARAHDAVAIALRG-    | 99  |
| ZmDBF2         | GSEGKHPTFRGVRMRW-GKWSEIREPRK-KSRIWLGTFPTAEMAARAHDAVAIALRG-     | 143 |
| ERF038         | SSDGKHPVYRGVRRNRW-GKWSEIREPRK-KSRIWLGTFPTAEMAARAHDAVAIALRG-    | 144 |
| GhDREBP1       | RTQQKEKPFIRMRKW-GKWAIEIREPNK-RSRIWLGSTYTPVAAAARAYDTAVFYLRG-    | 78  |
| ERF_QDB64575.1 | EGGAPSKTFKGVRRKRW-GKWSEIREPNK-RSRIWLGSTYTPAEMAARAYDAAVVCLRG-   | 97  |
| ERF_QCF46602.1 | EIVPSKTSFKGVRRKRW-GKWSEIREPNK-RSRIWLGSTYTPAEMAARAYDAAVVCLRG-   | 99  |
| ERF            | LHSGSPKVKYGVRRKRW-GKWSEIREPNK-RSRIWLGSTYTPAEMAARAYDAAVVCLRG-   | 99  |
| PpDBF1         | KPVGSPKVKYGVRRKRW-GKWSEIREPNK-RSRIWLGSTYTPAEMAARAYDAAVVCLRG-   | 96  |
| DsDBF1         | QSPACPKLYKGVRRMRW-GKWSEIREPNK-RSRIWLGSTYTPAEMAARAYDAAVVCLRG-   | 99  |
| DREBP5         | ETQSSSVHYKGVRRMRW-GKWSEIREPNK-RSRIWLGSTYTPAEMAARAYDAAVVCLRG-   | 95  |
| ERF039-like    | EECDSSPSYKGVRRRWS-GKWSEIREPRK-RSRIWLGSTFPTAEMAARAYDAVFCVLRG-   | 95  |
| OsRAP          | SPPMEKKYKGVRRRWS-GKWSEIREPNK-RSRIWLGSTYTPAEMAARAFDAVFCVLRG-    | 66  |
| ERF_TINY-like  | EESTASPRYKGVRRKRW-GKWSEIREPRK-RSRIWLGSTYTPAEMAARAYDAVFCVLRG-   | 92  |
| GmDREBP3       | EEHSDSKYKGVRRKRW-GKWSEIREPNK-RQRIWLGSTYTPAEMAARAFDAVFCVLRG-    | 66  |
| ERF016         | ---GNNGRYKGVRRMRW-GKWAIEVREPNS-RGRIWLGSTYTADEAARAYDAVFCVLRG-   | 63  |
| ERF016_XP      | VNNNSARYKGVRRMRW-GKWAIEVREPNS-RRRIWLGSTYTADEAARAYDAVFCVLRG-    | 68  |

|                |                                                              |     |
|----------------|--------------------------------------------------------------|-----|
| GmDREBP        | --FC--ARLNFPNVQVSTFS--EE-----PSRNSP-----AAAYQS--RNSPSAKE     | 153 |
| OsDREBP2A      | --PT--ARVNFADNSTDANS--GCTSAPSLMMSNGP-----A--TIP--SD--EKDE    | 164 |
| TaDREBP1       | --AK--ARVNFSEQSPDANS--GCTLAPPLPMSNGA-----TAASHP--SD--GKDE    | 167 |
| DREBP1A        | GGGGGGACCLNFADSAWLLAVPR-----SYRTLADVRHAVAEEAVEDFFRRRLAD      | 151 |
| CRT/DREBP      | -----RAACLNFADSARMLPVLAAG-----SSRFSSAREIKDAVAIAVLEFQRQRPVV   | 137 |
| OsDREB1F       | --RG--AELNFPDSPSTLPR-----ARTASP-EDIRLAAAQAAELYRPPPPPL        | 140 |
| CbCBF          | --RS--ACLNFADSARLRI-----PESTGA-KEIQKAAAAEALAFQDEMMMS         | 144 |
| BnCBF          | --RG--ACLNFADSARLRI-----PETTCA-KDIQKAAAAEALAFEAKSDT          | 141 |
| CaCBF1B        | --RS--ACLNFADSARLPLV-----PASSDT-KDIQKAAAAEAEFRPLKLEG         | 152 |
| PaDREB1F       | --KL--ACINFADSARLPLV-----PASMDT-MDIRRAAAEAAEGFRPVFEGG        | 153 |
| GhDBP          | --DF--ARLNFPNLRRHGSH--VG DYKPLPSSVD--AKLQAICESLVQNPQKQGSKKK  | 258 |
| GmDREBP_NP     | --EF--ARLNFPNLRRHGAFVFGFEGDYKPLPSSVD--SKLQAICESLAKQEEKPCCSV  | 222 |
| ZmDBF1         | --DA--ARLNFPDPAE-----SRAPLPAVD--AKLQAICATIAAASSSSKNSK        | 133 |
| TINY2          | --TA--AILNFPPELADSFPR-----PVSLSP-RDIQTAAAKAAHMEPTTSFSS       | 142 |
| ERF034         | --QS--AYLNFPDLAHQLPR-----PATASP-KDIQFAAAKAAAAPKSDGRH-        | 141 |
| ZmDBF2         | --RA--AHLNFPDLAGALPR-----AASAAP-KDVQAAAAALAAFTSPSS-EP        | 185 |
| ERF038         | --RA--AHLNFPDLAGVLP--AASASP-KDVQAAAAALAAFTTSPSSSP            | 187 |
| GhDREBP1       | --PS--ARLNFPDLIFQED-----EL-RDISAASIRKKATEVGAQVDA             | 116 |
| ERF_QDB64575.1 | --SN--ATLNFPDSPSSLL-----LPHCLSP-RDIQAAAAAATAAPP-DE           | 140 |
| ERF_QCF46602.1 | --SN--ATLNFPNSPPSSL-----PLCGSP-RQIQAAAAAATAAPP-DE            | 140 |
| ERF            | --QS--VKLNFPDSPQGV-----QCTSP-RDVQAAAAAATAACILPA-SA           | 140 |
| PpDBF1         | --RS--VKLNFPDSPPCA-----ARCNSP-REVQAAAAATAAVACIPSA-TA         | 137 |
| DsDBF1         | --QS--ATLNFPDSPQCI-----SPSRAP-KDVQAAAAAATAACASAS--           | 138 |
| DREBP5         | --QS--ATLNFPDSPQCV-----SPSREP-KDVQAAAAAATAACCTSS-AT          | 136 |
| ERF039-like    | --PS--AMLNFPDSPVISP-----GKKLTSSKDIQAAAAAATAKAVPRPAS          | 139 |
| OsRAP          | --HGAGADLNFPDSPSCD-----ARSSDP-RQVQAAALSHANRAHVTPQQA          | 111 |
| ERF_TINY-like  | --PS--AALNFPDSPPLSL-----PECHTP-REIQVVAATAAASCTPLN            | 134 |
| GmDREBP3       | --RN--AKFNFPDNPDIAG-----GTSMT-P-SQIQIAAAQFANAGPHEG--         | 106 |
| ERF016         | --SS--ATLNFPDNPPEIPL-----ADEMTP-VQIQEFAFRHARRAPAQS--         | 103 |
| ERF016_XP      | --SS--GKLNFPDNPDIAD-----ASELTP-EQIQEAAFRHARKDITEE--          | 108 |
| ***            |                                                              |     |
| GmDREBP        | SGSALVILERSECMMLWNNSGGDAAEDD-----G-----MED-----LSLSLSVK      | 193 |
| OsDREBP2A      | LESPPFIVANGPAVLYQ-PDKKDVLERV-----V-----PEVQDVKTEGNSGLKRV     | 209 |
| TaDREBP1       | SESPPSLISNAPTAALHRSADAKDESESA-----G-----TVARKVKKEVSNDLRST    | 213 |
| DREBP1A        | DALSATS-----SSSTTP-----STPRTDDEESAATDGEDESSPAS--             | 188 |
| CRT/DREBP      | ST-----SEMHDGEKDAQGSPTSELSTS--                               | 161 |
| OsDREB1F       | ALP-----EDPQEGTS-----                                        | 151 |
| CbCBF          | -----DTTTT--D--HGFDMEETFVE--AIVTAEQ-----                     | 168 |
| BnCBF          | TTNDHGMNMA-----S-QVEVNDTT--D--HOLDMEETIVE--AVFREEQREGFYMAE-- | 187 |
| CaCBF1B        | ISKESSS-----S-----                                           | 160 |
| PaDREB1F       | VCSGSSD-----EKERMV--QV--EEKNKKGSVN-----                      | 179 |
| GhDBP          | SS-KVTADTK--SR--NNKSDMAE--PKPEEN-----TAKVENSSSL--S--         | 295 |
| GmDREBP_NP     | EDVKPVIHAA--EL-AEVESDVAKSNAEYVYFEF-----DFKVEHENPMF--         | 265 |
| ZmDBF1         | AKSKAMPINA--S-----VLEAAA--ASPSN-----SSSDESGSGF--             | 166 |
| TINY2          | STSSS-----SSL-SSTSS-LE--SLVL-----V-----MDLSR--T-----         | 168 |
| ERF034         | -----SPADR--AP-----                                          | 148 |
| ZmDBF2         | GAG-----A-HEEP-----AAK-----D-----GAAP-----                   | 202 |
| ERF038         | SSS-----L-SADD--VA--PCVV-----H-----ADADE--QPAAAA             | 213 |
| GhDREBP1       | LQTS-LHHAS--AS-SSESS-NP--TRVFRKPDNLKYPD-----SSDED-----       | 153 |
| ERF_QDB64575.1 | GSTPSSSTVP--S--AS-PP--PRPN-----S--                           | 160 |
| ERF_QCF46602.1 | ASNPASDPAS--SQ-PDEGS-NP--TRPFSIPELGIVKR--EAFDSQPNEGSPAKPF    | 190 |
| ERF            | LPMVN-HS-V-----T-PSFES-TP--LN--SLHSSSGMSS-----DDEAEDIDRSHHV  | 181 |
| PpDBF1         | LTVAN-FQSP--A-QTLES-SP--LH--SSPSSSDMSS-----GDEDSGEDSVQSF     | 179 |
| DsDBF1         | -PLA--EPTN--T-PTFES-TT--V--ESLHSPHLC-----EA-----             | 165 |
| DREBP5         | PSIG--EPAN--I-PTFES-SS--SAVESFSASSSQ-----EA-----             | 166 |
| ERF039-like    | VTSKPV-----PLPSSS-----KQAQEEEAAPVTPL                         | 164 |
| OsRAP          | AAAL-----MS--P--PSLSPP-----PGFATGSEVVA                       | 137 |
| ERF_TINY-like  | FQVKEEAQLGFLSI-RNETN-VS--PRSHLRPVESEN-----SSTSEGRS-----      | 177 |
| GmDREBP3       | -----HS--GRPEHPMESPS-----PSVSEGTI-----                       | 128 |
| ERF016         | -----VE--DLGSNEA--AV-----                                    | 114 |
| ERF016_XP      | -----AE--VKEMAA--GG-----                                     | 119 |



|                |                                                            |     |
|----------------|------------------------------------------------------------|-----|
| GmDREBP        | HEE-----GE--DESGTS--SSYLSLS-----                           | 211 |
| OsDREBP2A      | CQERKMEVC-----ESEGIVLHKVNIS--YDYFNVHEVV----EMI             | 246 |
| TaDREBP1       | HEEHKTLEVS-----QPKGKALHKAANVS--YDYFNVEEVL----DMI           | 250 |
| DREBP1A        | -----DLAFELDVLSDMGWDLYYASLAQGML                            | 214 |
| CRT/DREBP      | -----SDLLDEHWFGGMDAGSYASLAQGML                             | 187 |
| OsDREB1F       | -----GGG--ATATSGRPAAVFVD-----EDAIFDMPGLIDDMARGMM           | 187 |
| CbCBF          | -----SASLYID-----EEDMFGMPSLMASMAEGML                       | 194 |
| BnCBF          | --ET----T-VVG--VVPPEQMSKGFYMD-----EEMFGMPTLLADMAAGML       | 226 |
| CaCBF1B        | -----TPESMFFMD-----EELFCMPGLLTNMAEGLM                      | 188 |
| PaDREB1F       | -----LERSRSLSLSYWD-----EEVFHMPRLLDHMAEGLL                  | 211 |
| GhDBP          | -----TVQSESE-----GSAV-----                                 | 306 |
| GmDREBP_NP     | -----SGES-----                                             | 269 |
| ZmDBF1         | -----GSDDE-M-----SSSS-----                                 | 176 |
| TINY2          | -E--SEELGEIVLPSLGAS-YDVDSANLGNE-----FVFYD-----             | 201 |
| ERF034         | -----SSPTADNDDDD-----AALFDLPDLL-----                       | 169 |
| ZmDBF2         | -EAAADAQAPVPVALPPPAASRPGTPSSGVEDE-----RQLFDLPDLL-----      | 244 |
| ERF038         | KNDDDDGSTTAPV-----AAAAAAAADDE-----QQLFDLPDLL-----          | 247 |
| GhDREBP1       | -----PVKKEVQ-EDGEDDH-----NLQGLFDMPMSPEDL-----              | 153 |
| ERF_QDB64575.1 | -----HE-EGTVKREIM-E--EEDNHLQGLLMDGILNLPSPDF-----           | 189 |
| ERF_QCF46602.1 | SIELG-----HVDVVPVE-----                                    | 230 |
| ERF            | TKF--CS--HVDVVPVE-----                                     | 194 |
| PpDBF1         | VAEGSQIS-----PSEVVPVLEWVKVEFGDK-----ETVAAGDVDFDCDYSFI----- | 222 |
| DsDBF1         | SSALAMAE-----PQSSFEVEEWIQAEGDL-----EPLIDNAFRFPPELPPC-----  | 207 |
| DREBP5         | SSAVT-LT-----SSSTVPLEEWINSEFGEL-----EPLIDNAFRFPPELPPC----- | 207 |
| ERF039-like    | LVSE-----SSPSSLRRTWSL-----QLDEDFAMA-MLLPPLPPLP-----        | 200 |
| OsRAP          | VRADGSIDWRPVMHPPPLYSPPGWGG-----GHAYDFLQPP-----PPSP-----    | 178 |
| ERF_TINY-like  | -RKI--DLS-----SKD-----EHDEELDYTG-----ESCP-----             | 200 |
| GmDREBP3       | -QTDS-DVP-----TLN-----GSVTD-LFTP-----VGSS-----             | 151 |
| ERF016         | -----VSAS-----GSSS-----                                    | 122 |
| ERF016_XP      | -----NFNG-----ECYF-----                                    | 127 |
| GmDREBP        | -----                                                      | 211 |
| OsDREBP2A      | IVELSADQKTE-----VHEEYQ-EGD-----                            | 266 |
| TaDREBP1       | IVELSADVME-----AHEEYQ-DGD-----                             | 270 |
| DREBP1A        | MEPPSAALG--DDGD-----AILADVPLWSY-----                       | 238 |
| CRT/DREBP      | MEPPSARTWSEDDGE-----YSAVYTPLWN-----                        | 212 |
| OsDREB1F       | LTPPAIGRSLDDWAAID-----DDDDHYHMDYKLWMD-----                 | 219 |
| CbCBF          | LPLPSVQ--WNHNYDID-----GDD--VSLWSY-----                     | 219 |
| BnCBF          | LPLPSVQ--WGHNDDE-----GDAD--MNLWNY-----                     | 251 |
| CaCBF1B        | LPPPQCAEIGDHV--ET-----ADAD--TPLWSYSI-----                  | 215 |
| PaDREB1F       | LSPSQCLGGYMNLDMDG-----TDAD--VKLWSFSI-----                  | 240 |
| GhDBP          | -SSPLSDLT--FSDFDE--QPWPEVVSSE-TFMLS KYP-SEIDWSILKA-----    | 350 |
| GmDREBP_NP     | -SSPESSVTFLDSDSDS-NNQWDE--ME-NFGLKFPSEIDWEAI-----          | 312 |
| ZmDBF1         | -PTPVVAPPVADMGLDLS-EVPWDE--DE-SFVLRKYPSEIDWDALLSN-----     | 222 |
| TINY2          | -----SVDYCLYPPPWGQSSSEDNVGHGISPNI-GHGLSWDL-----            | 236 |
| ERF034         | -----LDLKWSSW-----LSSSSSE--YFAEIRLDHEPFLWEPPQLGENIHVFD     | 211 |
| ZmDBF2         | -----LDIRDFGRFPFMWAPLTDVEDVNAELRL-EEPLLWE-----             | 281 |
| ERF038         | -----FDIQDGPFGFPAMWAPLADVDE-VNAELRL-EEPLLWDLGVTDA-----     | 289 |
| GhDREBP1       | -----                                                      | 153 |
| ERF_QDB64575.1 | -ALPAAAM-----EF-APSTSEFWELDNLWSFSR-----                    | 216 |
| ERF_QCF46602.1 | --IPVAAI-----EP-AAAASEFWELDNLWGFAR-----                    | 256 |
| ERF            | -----                                                      | 194 |
| PpDBF1         | -SEFAADS-----LLACSYNSKG--RTEYLP-IETHDAALYDSTLWFF-----      | 261 |
| DsDBF1         | -----VFDSQFI-F--QPSAGP-LEADNRALYDS-LWCFS-----              | 238 |
| DREBP5         | -----DQICQ-----LPSGAF-LDTESRMLYDS-LWCFS-----               | 234 |
| ERF039-like    | -PIQMTD-----E-EDSDHGVLEHLDLW-----                          | 221 |
| OsRAP          | -PLPSCDDMDVVD-----ESSASLWSFDTRD-----                       | 205 |
| ERF_TINY-like  | -PLL TADDYYVSLDDVELAWDMKVDL-----NFLDLPPLEDFEDGPRKLT KT     | 249 |
| GmDREBP3       | -GYADYGIFFGDFDGFYVPEMPNVNYGE-ENGEGFVDESFLWNF-----          | 198 |
| ERF016         | -GYGVDD--V-----GVDGAFYQSPGLWTF-----                        | 144 |
| ERF016_XP      | -GGGSVG--D-----GSGGYHSSGFWTF-----                          | 149 |

|                |                                   |     |
|----------------|-----------------------------------|-----|
| GmDREBP        | -----                             | 211 |
| OsDREBP2A      | --DGFSLFSY-----                   | 274 |
| TaDREBP1       | --DGFSLFSY-----                   | 278 |
| DREBP1A        | -----                             | 238 |
| CRT/DREBP      | -----                             | 212 |
| OsDREB1F       | -----                             | 219 |
| CbCBF          | -----                             | 219 |
| BnCBF          | -----                             | 251 |
| CaCBF1B        | -----                             | 215 |
| PaDREB1F       | -----                             | 240 |
| GhDBP          | -----                             | 350 |
| GmDREBP_NP     | -----                             | 312 |
| ZmDBF1         | -----                             | 222 |
| TINY2          | -----                             | 236 |
| ERF034         | L---HSLV-----                     | 216 |
| ZmDBF2         | -----                             | 281 |
| ERF038         | -----                             | 289 |
| GhDREBP1       | -----                             | 153 |
| ERF_QDB64575.1 | -----                             | 216 |
| ERF_QCF46602.1 | -----                             | 256 |
| ERF            | -----                             | 194 |
| PpDBF1         | -----                             | 261 |
| DsDBF1         | -----                             | 238 |
| DREBP5         | -----                             | 234 |
| ERF039-like    | -----                             | 221 |
| OsRAP          | -----SYFRY-----                   | 210 |
| ERF_TINY-like  | NSGRQSLVQYCRQFSSNYERVDSMHLVCDVFTM | 282 |
| GmDREBP3       | -----                             | 198 |
| ERF016         | -----                             | 144 |
| ERF016_XP      | -----                             | 149 |

**Figure S2.** Sequence alignments of DsDBF1 and other known ERF/DREB proteins from mosses and vascular plants such as *Syntrichia caninervis* (DREBP5\_AMT92109.1), *Physcomitrium patens* (ERF RAP2-1-like\_XP 024372564.1; PpDBF1 ABA43687.2; ERF\_TINY-like\_XP 024390306.1), *Gossypium hirsutum* (GhDREBP1\_AAO43165.1; GhDBP\_RAP2-4-like\_NP 001314591.1), *Glycine max* (GmDREBP3\_ABB36646.1; GmDREBP\_NP 001345276.1; GmDREBP\_NP 001345278.1), *Oryza sativa* (OsRAP\_XP 468111.1; OsDREBP2A\_XP 025878770.1; DREBP1A\_XP 015610912.1; OsDREB1F\_NP 001359120.1; ERF038\_XP 015614793.1), *Triticum aestivum* (TaDREBP1\_AAL01124.1; CRT/DREBP\_XP 044398325.1), *Zea mays* (ZmDBF1\_AAM80486.1; ZmDBF2\_AAM80485.1), *Capsicum annuum* (CaCBF1B\_AAQ88400.1), *Capsella bursa-pastoris* (CbCBF\_AAR26658.1), *Brassica napus* (BnCBF\_AAL38243.1), *Prunus avium* (PaDREB1F\_XP 021803652.1), *Arabidopsis thaliana* (TINY2\_NP 196720.1), *Bryum argenteum* (ERF\_QDB64575.1), *Pohlia nutans* (ERF\_QCF46602.1), *Selaginella moellendorffii* (ERF039-like\_XP 024530345.1), *Citrus sinensis* (ERF016\_XP 006474696.1), *Apostasia shenzhenica* (ERF034\_PKA61103.1) and *Theobroma cacao* (ERF016\_XP 007012585.2). Multiple alignment was performed using Clustal Omega. Amino acid sequences are highlighted with different colors. Sequences marked by (\*) show conserved amino acid residues.
